# Supplementary material for: Oxidative DNA damage induces hypomethylation in a compromised base excision repair colorectal tumourigenesis
Source: PubMed Central journal article supplement — Br J Cancer. 2017 Jan 31;116(6):793–801. doi: 10.1038/bjc.2017.9 (PMC5355935; doi:10.1038/bjc.2017.9), 2017-01-31
Supplement: bjc20179x1.pdf [file bjc20179x1.pdf]

Table S1. Histopathological and molecular features of 49 colorectal adenomas from 14 MAP patients

| MAP patients | <i>MUTYH</i> germline mutations |                    | Age at diagnosis | Adenoma | Histological features | Site        | Dysplasia | % Methylation |        | Mutation |        |
|--------------|---------------------------------|--------------------|------------------|---------|-----------------------|-------------|-----------|---------------|--------|----------|--------|
|              | DNA change                      | Protein            |                  |         |                       |             |           | LINE-1        | LI-MET | KRAS     | NRAS   |
| <b>M1</b>    | c.1187G>A                       | p.G396D            | 51               | A1      | TB                    | Cecum       | low       | 61.43         | 56.23  | WT       | WT     |
|              | c.1187insGG                     | p.G396GfsX12       |                  | A2      | TB                    | NA          | NA        | 63.20         | 62.50  | WT       | WT     |
|              |                                 |                    |                  | A3      | TB                    | NA          | NA        | 54.08         | 58.97  | WT       | WT     |
|              |                                 |                    |                  | A4      | TBV                   | Right colon | low       | 56.25         | N.A.   | p.G12C   | WT     |
| <b>M2</b>    | c.1187G>A                       | p.G396D            | 48               | A1      | TB                    | Sigma       | low       | 75.33         | 67.33  | WT       | p.G12S |
|              | c.1187insGG                     | p.G396GfsX12       |                  | A2      | TBV                   | Sigma       | low       | 66.60         | 69.57  | WT       | WT     |
|              |                                 |                    |                  | A3      | TBV                   | Sigma       | low       | 62.3          | 59.6   | WT       | WT     |
| <b>M3</b>    | c.1103delCC                     | p.P367QfsX160      | 79               | A1      | TB                    | Cecum       | low       | 68.05         | 67.07  | p.G12C   | WT     |
|              | c.1187G>A                       | p.G396D            |                  | A2      | TBV                   | Rectum      | low       | 45.45         | 64.3   | WT       | p.G12C |
|              |                                 |                    |                  | A3      | TBV                   | Rectum      | low       | 63.18         | 58.7   | WT       | WT     |
| <b>M4</b>    | c.536A>G                        | p.Y179C            | 47               | A1      | TB                    | Colon NOS   | low       | 59.00         | 62.53  | p.G12C   | WT     |
|              | c.536A>G                        | p.Y179C            |                  | A2      | TB                    | Colon NOS   | low       | 61.05         | 59.80  | p.G12C   | WT     |
|              |                                 |                    |                  | A3      | TBV                   | Colon NOS   | low       | 61.45         | 60.87  | p.G12C   | WT     |
|              |                                 |                    |                  | A4      | TB                    | Colon NOS   | low       | 62.73         | 59.37  | WT       | p.G12V |
| <b>M5</b>    | c.536A>G                        | p.Y179C            | 44               | A1      | TBV                   | Sigma       | high      | 46.93         | 54.37  | WT       | WT     |
|              | c.536A>G                        | p.Y179C            |                  | A2      | TB                    | Right colon | low       | 56.85         | 63.13  | WT       | WT     |
|              |                                 |                    |                  | A3      | TBV                   | Right colon | high      | 55.98         | 57.2   | WT       | WT     |
|              |                                 |                    |                  | A4      | TB                    | Right colon | low       | 62.15         | 53.4   | WT       | p.G12C |
|              |                                 |                    |                  | A5      | TB                    | Right colon | high      | 61.58         | 63.9   | WT       | WT     |
|              |                                 |                    |                  | A6      | TB                    | Right colon | low       | 64.78         | 58.36  | WT       | WT     |
| <b>M6</b>    | c.536A>G<br>c.1105G>T           | p.Y179C<br>p.E369X | 42               | A1      | TBV                   | Colon NOS   | low       | 51.63         | 59.17  | p.G12C   | WT     |
| <b>M7</b>    | c.312C>A<br>c.325C>T            | p.Y104X<br>p.R109W | 50               | A1      | TB                    | Right colon | low       | 54.97         | 59.36  | WT       | WT     |
| <b>M8</b>    | c.536A>G<br>c.536A>G            | p.Y179C<br>p.Y179C | 47               | A1      | TB                    | Sigma       | low       | 59.88         | 60.86  | p.G13D   | WT     |
| <b>M9</b>    | c.1187insGG                     | p.G396GfsX12       | 40               | A1      | TBV                   | Rectum      | low       | 53            | 59.9   | p.G12C   | WT     |
|              | c.1187insGG                     | p.G396GfsX12       |                  | A2      | TB                    | Rectum      | low       | 62.43         | 64.8   | WT       | WT     |
|              |                                 |                    |                  | A3      | TBV                   | Rectum      | low       | 69.28         | 64     | WT       | WT     |
|              |                                 |                    |                  | A4      | TBV                   | Rectum      | low       | 54.6          | 55.73  | p.G12C   | WT     |

|            |                                 |                        |    |    |     |                    |     |       |       |             |    |
|------------|---------------------------------|------------------------|----|----|-----|--------------------|-----|-------|-------|-------------|----|
|            |                                 |                        |    | A5 | TBV | Rectum             | low | 56.4  | 55.88 | p.G12C      | WT |
|            |                                 |                        |    | A6 | TBV | Rectum             | low | 61.95 | 62.53 | p.G12C      | WT |
|            |                                 |                        |    | A7 | TB  | Rectum             | low | 61.2  | 62.63 | p.G12C      | WT |
| <b>M10</b> | 692G>A<br>c.1395_1397del<br>GGA | p.R231H<br>p.E466del.  | 43 | A1 | TB  | Right colon        | low | 62.28 | 62    | WT          | WT |
|            |                                 |                        |    | A2 | TB  | Left colon         | low | 68.85 | 62.1  | WT          | WT |
|            |                                 |                        |    | A3 | TB  | Right colon        | low | 59.55 | 61.5  | p.G12C      | WT |
|            |                                 |                        |    | A4 | TB  | Right colon        | low | 73.2  | 68.36 | WT          | WT |
|            |                                 |                        |    | A5 | TB  | Rectum             | low | 64.95 | 65.73 | WT          | WT |
|            |                                 |                        |    | A6 | TBV | Right colon        | low | 65.15 | 61.63 | p.G12<br>A  | WT |
| <b>M12</b> | c.733C>T<br>c.1187G>A           | p.R245C<br>p.G396D     | 50 | A1 | TB  | Right colon        | low | 71.2  | 63.96 | p.G12C      | WT |
|            |                                 |                        |    | A2 | TBV | Rectum             | low | 70.61 | 63.4  | p.K117<br>N | WT |
|            |                                 |                        |    | A3 | TB  | Right colon        | low | 65.1  | 63.5  | p.G12C      | WT |
| <b>M14</b> | c.494A>G<br>c.1145G>A           | p.E77X<br>p.E393X      | 65 | A1 | TB  | Colon NOS          | low | 52.05 | 52.93 | WT          | WT |
|            |                                 |                        |    | A2 | TB  | Colon NOS          | low | 60.07 | 53.4  | WT          | WT |
| <b>M15</b> | c.1187G>A<br>c.1187G>A          | p.G396D<br>p.G396D     | 39 | A1 | TBV | NA                 | low | 60.98 | N.A.  | WT          | WT |
|            |                                 |                        |    | A2 | TB  | NA                 | low | 51.5  | 54.2  | WT          | WT |
| <b>M16</b> | c.536A>G<br>c.933 +3A>C         | p.Y179C<br>p.G264WfsX7 | 54 | A1 | TB  | Hepatic<br>flexure | low | 60.23 | 56.9  | WT          | WT |
|            |                                 |                        |    | A2 | TBV | Cecum              | low | 55.78 | 54.1  | WT          | WT |
|            |                                 |                        |    | A3 | TB  | Colon NOS          | low | 64.06 | 56.6  | WT          | WT |
|            |                                 |                        |    | A4 | TB  | Cecum              | low | 60.9  | 59    | p.G12C      | WT |
|            |                                 |                        |    | A5 | TB  | Colon NOS          | low | 58.55 | 57.7  | WT          | WT |
|            |                                 |                        |    | A6 | TBV | Colon NOS          | low | 53.4  | 55.6  | WT          | WT |

MAP, *MUTYH*-associated-polyposis; TB, tubular adenoma; TBV, tubulovillous adenoma; WT, wild type; NA, Not Available; NOS, Not Otherwise Specified.

Table S2. Histopathological and molecular features of 36 adenomas from 17 FAP/AFAP patients included in the study

| FAP/AFAP patients | APC germline mutations        |               | Age at diagnosis | Adenoma | Histological features | Site         | Dysplasia | % Methylation |        | Mutation         |      |
|-------------------|-------------------------------|---------------|------------------|---------|-----------------------|--------------|-----------|---------------|--------|------------------|------|
|                   | DNA change                    | Protein       |                  |         |                       |              |           | LINE-1        | L1-MET | KRAS             | NRAS |
| <b>F1</b>         | c.3577_3578 delCA             | p.Q1193VfsX14 | 29               | A1      | TB                    | Rectum       | low       | 68.25         | 66.43  | WT               | WT   |
| <b>F2</b>         | c.505delATAGA                 | p.I169X       | 31               | A1      | TB                    | Sigma        | low       | 54.10         | 58.80  | WT               | WT   |
|                   |                               |               |                  | A2      | TB                    | Rectum-Sigma | low       | 66.75         | 64.47  | WT               | WT   |
|                   |                               |               |                  | A3      | TB                    | Colon NOS    | low       | 59.33         | 60.10  | WT               | WT   |
| <b>F3</b>         | c.505delATAGA                 | p.I169X       | 38               | A1      | TB                    | Right colon  | low       | 60.33         | 61.53  | WT               | WT   |
| <b>F4</b>         | c.2524_2525 insA              | p.D842EfsX74  | 37               | A1      | TB                    | Sigma        | low       | 67.53         | 64.83  | p.G12V           | WT   |
|                   |                               |               |                  | A2      | TB                    | Right colon  | low       | 63.43         | NA     | WT               | WT   |
| <b>F5</b>         | c.4147_4148 delAT             | p.M1383VfsX2  | 30               | A1      | TB                    | Left colon   | NA        | 68.78         | 60.43  | WT               | WT   |
|                   |                               |               |                  | A2      | TBV                   | Left colon   | low       | 60.40         | 53.83  | p.G12S           | WT   |
|                   |                               |               |                  | A3      | TBV                   | Sigma        | low       | 64.03         | 61.60  | p.G12V           | WT   |
| <b>F6</b>         | Whole gene del.               |               | 48               | A1      | TBV                   | NA           | low       | 67.33         | 61.47  | p.G12D           | WT   |
| <b>F7</b>         | c.2734delT                    | p.L912 YfsX3  | 21               | A1      | TB                    | Colon NOS    | low       | 71.95         | 60.63  | WT               | WT   |
| <b>F8</b>         | c.2734delT                    | p.L912 YfsX3  | 23               | A1      | TB                    | Sigma        | low       | 64.58         | 69.00  | WT               | WT   |
| <b>F9</b>         | c.677_684 delAGGACATAins TTTC | p.K226 IfsX66 | 61               | A1      | TBV                   | NA           | low       | 62.75         | 62.60  | p.G12V + p.A146P | WT   |
|                   |                               |               |                  | A2      | TBV                   | NA           | low       | 59.8          | NA     | p.G12V           | WT   |
| <b>F10</b>        | c.3495-3496insA               | p.Y1166 IfsX1 | 19               | A1      | TB                    | Sigma        | low       | 64.38         | 61.30  | WT               | WT   |
| <b>F11</b>        | c.745A>T                      | p.K249X       | 37               | A1      | TB                    | Rectum       | low       | 66.50         | 62.77  | WT               | WT   |
| <b>F12</b>        | c.2626C>T                     | p.R876X       | 37               | A1      | TBV                   | Rectum-Sigma | high      | 53.53         | NA     | p.G13D           | WT   |
| <b>F13</b>        | c.3926del5                    | p.E1309DfsX3  | 42               | A1      | TB                    | Left colon   | low       | 60.73         | 61.2   | WT               | WT   |
|                   |                               |               |                  | A2      | TB                    | Left colon   | low       | 61.88         | 63.07  | p.G13C           | WT   |

|            |                    |              |    |    |     |                  |      |       |       |    |    |
|------------|--------------------|--------------|----|----|-----|------------------|------|-------|-------|----|----|
|            |                    |              |    | A3 | TB  | Colon NOS        | low  | 60.3  | 59.63 | WT | WT |
|            |                    |              |    | A4 | TBV | Colon NOS        | low  | 57.83 | 58    | WT | WT |
|            |                    |              |    | A5 | TB  | Colon NOS        | low  | 60.13 | 58.93 | WT | WT |
|            |                    |              |    | A6 | TBV | Ampulla of Vater | low  | 65.5  | 61.53 | WT | WT |
|            |                    |              |    | A7 | TBV | Colon NOS        | high | 61.1  | 62.73 | WT | WT |
|            |                    |              |    | A8 | TB  | Left colon       | low  | 59.43 | 60.33 | WT | WT |
|            |                    |              |    | A9 | TB  | Right colon      | low  | 62.1  | 57.83 | WT | WT |
| <b>F14</b> | c.4549_455 delCAGA | p.Q1517KfsX5 | 57 | A1 | TB  | Duodenum         | low  | 63.1  | 63.6  | WT | WT |
|            |                    |              |    | A2 | TB  | Ampulla of Vater | low  | 65.38 | 63.03 | WT | WT |
|            |                    |              |    | A3 | TB  | Ampulla of Vater | low  | 65.1  | 61.13 | WT | WT |
| <b>F15</b> | t(5;7) (q22;p15)   |              | 33 | A1 | TB  | Rectum           | low  | 62.63 | 62.56 | WT | WT |
| <b>F16</b> | c.637C>T           | p.R213X      | 22 | A1 | TB  | Rectum           | low  | 70.18 | 67.3  | NA | NA |
|            |                    |              |    | A2 | TB  | Right colon      | low  | 72.98 | 68.13 | WT | WT |
|            |                    |              |    | A3 | TB  | Left colon       | low  | 70.25 | 64.8  | WT | WT |
|            |                    |              |    | A4 | TB  | Rectum           | low  | 61.1  | 68.06 | WT | WT |
| <b>F17</b> | Exon 2del.         |              | 40 | A1 | TB  | Sigma            | low  | 62.95 | 68.3  | WT | WT |

FAP/AFAP, classical/attenuated adenomatous polyposis; TB, tubular adenoma; TBV, tubulovillous adenoma; WT, wild type; NA, Not Available; NOS, Not Otherwise Specified.

Table S3. Histopathological and molecular features of 24 sporadic colorectal adenomas from 21 patients included in the study

| Sporadic patient | Age at diagnosis | Adenoma | Histological features | Site            | Dysplasia | % Methylation |        | Mutation |      |
|------------------|------------------|---------|-----------------------|-----------------|-----------|---------------|--------|----------|------|
|                  |                  |         |                       |                 |           | LINE-1        | L1-MET | KRAS     | NRAS |
| S1               | 62               | A1      | TBV                   | Rectum-Sigma    | high      | 66.53         | 65.13  | p.G12D   | WT   |
| S2               | 66               | A1      | TB                    | Rectum          | low       | 61.38         | 65.60  | WT       | WT   |
| S3               | 66               | A1      | TBV                   | Sigma           | low       | 59.48         | 62.37  | WT       | WT   |
| S4               | 77               | A1      | TBV                   | Sigma           | NA        | 60.88         | 63.03  | WT       | WT   |
| S5               | 54               | A1      | TBV                   | Sigma           | high      | 63.03         | 66.40  | WT       | WT   |
| S6               | 82               | A1      | TBV                   | Sigma           | low       | 62.03         | 65.67  | WT       | WT   |
| S7               | 75               | A1      | TBV                   | Sigma           | low       | 62.03         | 66.03  | WT       | WT   |
| S8               | 72               | A1      | TBV                   | Sigma           | low       | 59.05         | 66.37  | p.G12V   | WT   |
| S9               | 61               | A1      | TBV                   | Rectum-Sigma    | high      | 60.25         | 62.17  | p.G12V   | WT   |
| S10              | 71               | A1      | TBV                   | Sigma           | high      | 62.83         | 63.40  | p.G12D   | WT   |
| S11              | 50               | A1      | TBV                   | Colon NOS       | low       | 60.55         | 63.43  | p.G12D   | WT   |
| S12              | 67               | A1      | TB                    | Colon NOS       | low       | 62.4          | 61.2   | WT       | WT   |
| S13              | 68               | A1      | TB                    | Ascending colon | low       | 60.05         | 59     | WT       | WT   |
| S14              | 84               | A1      | TB                    | Hepatic flexure | low       | 63.13         | 62.9   | WT       | WT   |
| S15              | 62               | A1      | TB                    | Ascending colon | low       | 63            | 62.1   | WT       | WT   |
| S16              | 59               | A1      | TB                    | Colon NOS       | low       | 60.38         | 62.23  | WT       | WT   |
|                  |                  | A2      | TB                    | Colon NOS       | low       | 60.73         | 62.56  | WT       | WT   |
|                  |                  | A3      | TB                    | Colon NOS       | low       | 61.06         | 62.06  | WT       | WT   |
| S17              | 57               | A1      | TB                    | Sigma           | low       | 62.75         | 60.08  | WT       | WT   |
|                  |                  | A2      | TB                    | Left colon      | low       | 60.07         | 60.36  | WT       | WT   |
| S18              | 61               | A1      | TB                    | Colon NOS       | low       | 67.3          | 68.6   | WT       | WT   |
| S19              | 61               | A1      | TB                    | Ascending colon | low       | 62.9          | 67     | p.G12A   | WT   |
| S20              | 73               | A1      | TB                    | Colon NOS       | low       | 70            | 65.03  | WT       | WT   |
| S21              | 74               | A1      | TB                    | Rectum-Sigma    | low       | 69.23         | 65.07  | WT       | WT   |

Sporadic adenomas; TB, tubular adenoma; TBV, tubulovillous adenoma; WT, wild type; NA, Not Available; NOS, Not Otherwise Specified.

Table S4. . Molecular features of the 10 MAP adenocarcinomas found in 8 patients of our cohort; patients M1,M4,M6, M9, and M16 showed both adenomas and carcinomas whereas patients M11, M13, and M17 had only adenocarcinomas.

| MAP patient | MUTYH germline mutations               |                              | Age at diagnosis | Adenocarcinoma | Site            | % Methylation |        |        | Mutation |      |         |
|-------------|----------------------------------------|------------------------------|------------------|----------------|-----------------|---------------|--------|--------|----------|------|---------|
|             | DNA change                             | Protein                      |                  |                |                 | LINE-1        | L1-MET | KRAS   | NRAS     | BRAF | PI3KCA  |
| <b>M1</b>   | c.1187G>A<br>c.1187insGG               | p.G396D<br>p.G396GfsX12      | 51               | CRC            | NA              | 58.70         | 57.73  | p.G12C | WT       | WT   | p.Q546K |
| <b>M4</b>   | c.536A>G<br>c.536A>G                   | p.Y179C<br>p.Y179C           | 47               | CRC            | Ascending colon | 63.00         | 59.97  | p.G12C | WT       | WT   | WT      |
|             |                                        |                              |                  | CRC            | Ascending colon | 59.55         | 59.54  | p.G12C | WT       | WT   | WT      |
| <b>M6</b>   | c.536A>G<br>c.1105G>T                  | p.Y179C<br>p.E369X           | 42               | CRC            | Colon NOS       | 52.10         | 51.90  | p.G12C | WT       | WT   | p.Q546K |
| <b>M9</b>   | c.1186-1187 insGG<br>c.1186-1187 insGG | p.G396GfsX12<br>p.G396GfsX12 | 40               | CRC            | Rectum          | 62.52         | 58.90  | p.G12C | WT       | WT   | WT      |
|             |                                        |                              |                  | CRC            | Right colon     | 65.23         | 61.47  | p.G12V | WT       | WT   | WT      |
| <b>M11</b>  | c.1145G>A<br>c.1145G>A                 | p.G382D<br>p.G382D           | 47               | CRC            | Rectum          | 56.33         | 57.13  | p.G12C | WT       | WT   | WT      |
| <b>M13</b>  | c.733C>T<br>c.1187G>A                  | p.R245C<br>p.G396D           | 57               | CRC            | Right colon     | 53.03         | 51.46  | WT     | WT       | WT   | WT      |
| <b>M16</b>  | c.536A>G<br>c.933 +3A>C                | p.Y179C<br>p.G264WfsX7       | 54               | CRC            | Rectum          | 64.45         | 59.63  | p.G12C | WT       | WT   | WT      |
| <b>M17</b>  | c.536A>G<br>c.721C>T                   | p.Y179C<br>p.R241W           | 41               | CRC            | Right colon     | 59.60         | 58.50  | p.G12C | WT       | WT   | p. R38H |

MAP, *MUTYH*-associated-polyposis; CRC, colorectal cancer; WT, wild type; NA, Not Available; NOS, Not Otherwise Specified.

Table S5. Fifteen samples of histologically normal colonic mucosa derived from healthy individuals used for LINE-1 and L1-*MET* methylation studies

| <b>Samples of normal colonic mucosa</b> | <b>Age of patients</b> | <b>Site</b> |
|-----------------------------------------|------------------------|-------------|
| NM1                                     | 68                     | Right colon |
| NM2                                     | 57                     | Right colon |
| NM3                                     | 82                     | Left colon  |
| NM4                                     | 57                     | Right colon |
| NM5                                     | 72                     | Rectum      |
| NM6                                     | 60                     | Left colom  |
| NM7                                     | 63                     | Left colon  |
| NM8                                     | 71                     | Left colon  |
| NM9                                     | 81                     | Left colon  |
| NM10                                    | 56                     | Left colon  |
| NM11                                    | 39                     | Left colon  |
| NM12                                    | 45                     | Left colon  |
| NM13                                    | 77                     | Righ colon  |
| NM14                                    | 53                     | Left colon  |
| NM15                                    | 64                     | Left colon  |

NM, normal mucosa.
